# Supplementary material for: Empirical evaluation of spatial and non-spatial European-scale multimedia fate models: results and implications for chemical risk assessment
Source: Royal Society of Chemistry journal article supplement (doi:10.1039/b700680b), 2007-01-01
Supplement: b700680b.pdf [file b700680b.pdf]

Supplementary Material (ESI) for Journal of Environmental Monitoring  
This journal is © The Royal Society of Chemistry 2007

### **ELECTRONIC SUPPLEMENTARY INFORMATION (ESI)**

Empirical evaluation of spatial and non-spatial European-scale multimedia fate models:  
Results and implications for chemical risk assessment

DOI: 10.1039/b700680b

#### **Authors**

James M. Armitage<sup>1</sup>, Ian T. Cousins<sup>\*1</sup>, Mara Hauck<sup>2</sup>, Jasper V. Harbers<sup>2</sup>, Mark AJ Huijbregts<sup>2</sup>

#### **Affiliations**

1. Department of Applied Environmental Science (ITM), Stockholm University, 106 91 Stockholm, Sweden
2. Department of Environmental Science, Institute for Wetland and Water Research, Faculty of Science, Radboud University Nijmegen, P.O. Box 9010, 6500GL Nijmegen, The Netherlands

\* Corresponding author. Tel.: +46 8 16 4012; Fax: +46 8 674 7638; Email address: [ian.cousins@itm.su.se](mailto:ian.cousins@itm.su.se) (IT Cousins)

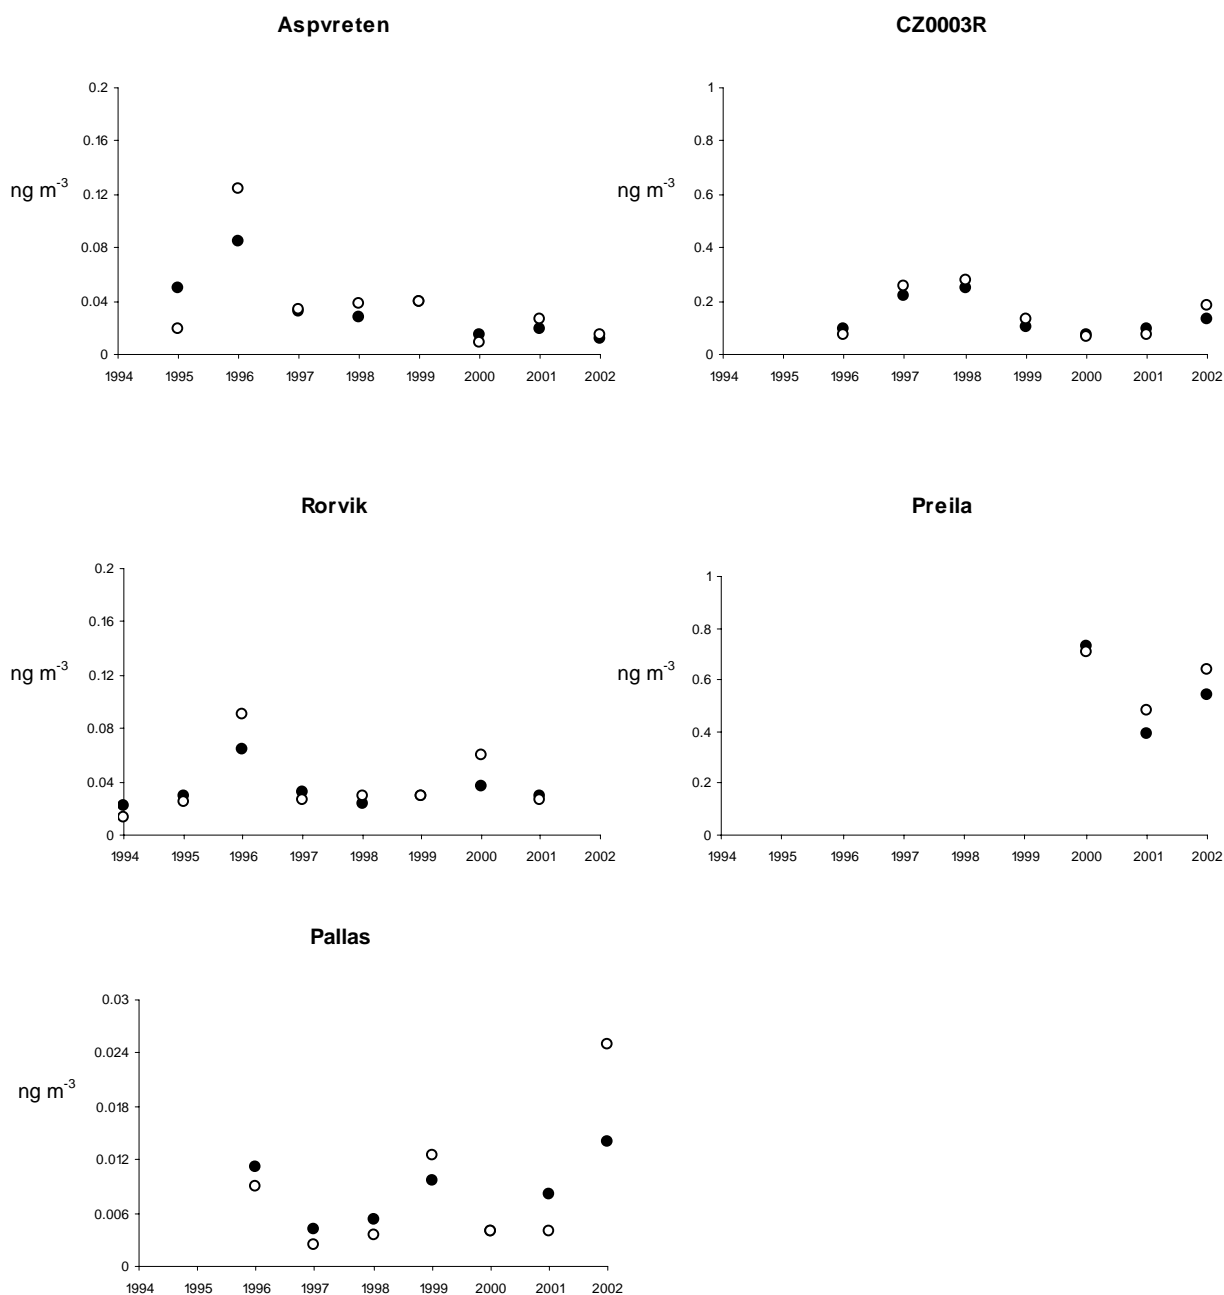

**Figure S1.** Temporal trends of annual geometric mean (closed circle) and median (open circle) BaP concentrations ( $\text{ng m}^{-3}$ ) from EMEP monitoring sites (1994 – 2002)

**Table S1.** Range of median observed concentrations calculated for individual EVn-BETR and IMPACT 2002 model zones containing monitoring data

(a) Air compartment ( $\text{ng m}^{-3}$ )

|          | EVn-BETR    | IMPACT2002  |
|----------|-------------|-------------|
| Chemical | Range       | Range       |
| BaP      | 0.01 - 0.64 | 0.03 - 0.14 |
| BbF      | 0.02 - 0.21 | 0.05 - 0.21 |
| BkF      | 0.02 - 0.14 | 0.05 - 0.14 |
| IP       | 0.01 - 0.18 | 0.04 - 0.18 |
| HCB      | 0.02 - 0.06 | 0.02 - 0.06 |

(b) Freshwater compartment ( $\text{ng L}^{-1}$ )

|          | EVn-BETR | IMPACT2002 |
|----------|----------|------------|
| Chemical | Range    | Range      |
| BaP      | 1.7 - 15 | 0.2 - 15   |
| BbF      | 2.2 - 23 | 0.6 - 23   |
| BkF      | 1.0 - 10 | 0.2 - 10   |
| IP       | 0.3 - 15 | 0.3 - 15   |

(c) Sediment compartment ( $\text{ng g}^{-1}$ )

|          | EVn-BETR  | IMPACT2002 |
|----------|-----------|------------|
| Chemical | Range     | Range      |
| BaP      | 44 - 430  | 9.3 - 660  |
| BbF      | 70 - 600  | 10 - 700   |
| BkF      | 40 - 290  | 6.2 - 360  |
| IP       | 4.1 - 350 | 13 - 505   |
| HCB      | 0.4 - 45  | 0.3 - 150  |

(d) Soil compartment ( $\text{ng g}^{-1}$ )

|          | EVn-BETR  | IMPACT2002 |
|----------|-----------|------------|
| Chemical | Range     | Range      |
| BaP      | 0.3 - 140 | 12 - 150   |
| BbF      | 0.6 - 150 | 16 - 155   |
| BkF      | 0.2 - 80  | 10 - 80    |
| IP       | 11 - 13   | 11 - 13    |
| HCB      | 0.2 - 1.1 | 0.2 - 1.5  |

**Table S2.** Comparison of median and range of predicted concentrations across the entire model domain and for model zones containing monitoring data for EVn-BETR and IMPACT2002 and predicted concentrations generated by SimpleBox 3.0.

(a) Air compartment (ng m<sup>-3</sup>)

| SimpleBox 3.0 |       |       | EVn-BETR            |              |                      |              | IMPACT2002          |               |                      |             |
|---------------|-------|-------|---------------------|--------------|----------------------|--------------|---------------------|---------------|----------------------|-------------|
| Chemical      | Value | Range | Entire Model Domain |              | With Monitoring Data |              | Entire Model Domain |               | With Monitoring Data |             |
|               |       |       | Median              | Range        | Median               | Range        | Median              | Range         | Median               | Range       |
| BaP           | 0.16  | -     | 0.047               | 0.003 - 0.42 | 0.12                 | 0.01 - 0.35  | 0.043               | 0.0004 - 0.38 | 0.11                 | 0.04 - 0.26 |
| BbF           | 0.50  | -     | 0.065               | 0.003 - 0.45 | 0.14                 | 0.01 - 0.23  | 0.049               | 0.0006 - 0.43 | 0.22                 | 0.13 - 0.31 |
| BkF           | 0.09  | -     | 0.033               | 0.002 - 0.21 | 0.05                 | 0.02 - 0.14  | 0.033               | 0.0003 - 0.18 | 0.10                 | 0.07 - 0.13 |
| IP            | 0.14  | -     | 0.044               | 0.003 - 0.38 | 0.07                 | 0.01 - 0.18  | 0.029               | 0.0004 - 0.33 | 0.08                 | 0.03 - 0.22 |
| HCB           | 0.11  | -     | 0.028               | 0.007 - 0.07 | 0.01                 | 0.007 - 0.03 | 0.043               | 0.0005 - 0.43 | 0.10                 | 0.08 - 0.12 |

(b) Freshwater compartment (ng L<sup>-1</sup>)

| SimpleBox 3.0 |       |       | EVn-BETR            |             |                      |             | IMPACT2002          |            |                      |           |
|---------------|-------|-------|---------------------|-------------|----------------------|-------------|---------------------|------------|----------------------|-----------|
| Chemical      | Value | Range | Entire Model Domain |             | With Monitoring Data |             | Entire Model Domain |            | With Monitoring Data |           |
|               |       |       | Median              | Range       | Median               | Range       | Median              | Range      | Median               | Range     |
| BaP           | 1.79  | -     | 0.037               | 0.001 - 0.5 | 0.077                | 0.03 - 0.18 | 0.78                | 0.01 - 4.5 | 1.8                  | 0.5 - 3.0 |
| BbF           | 0.27  | -     | 0.014               | 0.001 - 0.2 | 0.034                | 0.01 - 0.08 | 0.83                | 0.01 - 4.2 | 1.9                  | 0.6 - 4.2 |
| BkF           | 1.22  | -     | 0.023               | 0.001 - 1.9 | 0.051                | 0.02 - 0.11 | 0.56                | 0.01 - 2.9 | 1.1                  | 0.4 - 2.0 |
| IP            | 1.06  | -     | 0.028               | 0.001 - 0.4 | 0.059                | 0.01 - 0.12 | 0.51                | 0.01 - 5.1 | 1.3                  | 0.3 - 2.1 |

**Table S2 (continued).** Comparison of median and range of predicted concentrations across the entire model domain and for model zoned containing monitoring data for EVn-BETR and IMPACT2002 and predicted concentrations generated by SimpleBox 3.0.

(c) Sediment compartment (ng g<sup>-1</sup>)

| SimpleBox 3.0 |       |       | EVn-BETR            |            |                      |           | IMPACT2002          |               |                      |               |
|---------------|-------|-------|---------------------|------------|----------------------|-----------|---------------------|---------------|----------------------|---------------|
| Chemical      | Value | Range | Entire Model Domain |            | With Monitoring Data |           | Entire Model Domain |               | With Monitoring Data |               |
|               |       |       | Median              | Range      | Median               | Range     | Median              | Range         | Median               | Range         |
| BaP           | 13.8  | -     | 4.3                 | 0.11 - 62  | 8.5                  | 2.7 - 24  | 1.8                 | 0.02 - 11     | 4.2                  | 0.7 - 10      |
| BbF           | 1.2   | -     | 1.4                 | 0.05 - 20  | 3.3                  | 0.9 - 8.4 | 1.2                 | 0.01 - 6.4    | 2.8                  | 0.5 - 6.4     |
| BkF           | 9.1   | -     | 3.0                 | 0.08 - 36  | 5.4                  | 1.8 - 15  | 1.3                 | 0.02 - 6.6    | 2.8                  | 0.5 - 6.4     |
| IP            | 17.4  | -     | 4.7                 | 0.14 - 65  | 7.8                  | 2.3 - 21  | 1.8                 | 0.02 - 13     | 4.4                  | 1.4 - 7.6     |
| HCB           | 0.02  | -     | 0.2                 | 0.05 - 1.3 | 0.3                  | 0.1 - 0.5 | 0.001               | 4e-05 - 0.003 | 0.002                | 0.001 - 0.003 |

(d) Soil compartment (ng g<sup>-1</sup>)

| SimpleBox 3.0 |        |       | EVn-BETR            |                |                      |               | IMPACT2002          |               |                      |               |
|---------------|--------|-------|---------------------|----------------|----------------------|---------------|---------------------|---------------|----------------------|---------------|
| Chemical      | Value  | Range | Entire Model Domain |                | With Monitoring Data |               | Entire Model Domain |               | With Monitoring Data |               |
|               |        |       | Median              | Range          | Median               | Range         | Median              | Range         | Median               | Range         |
| BaP           | 0.16   | -     | 0.10                | 0.001 - 0.55   | 0.11                 | 0.04 - 0.33   | 0.07                | 0.002 - 0.28  | 0.20                 | 0.04 - 0.27   |
| BbF           | 0.02   | -     | 0.02                | 0.001 - 0.16   | 0.02                 | 0.01 - 0.08   | 0.05                | 0.001 - 0.22  | 0.18                 | 0.16 - 0.20   |
| BkF           | 0.11   | -     | 0.06                | 0.001 - 0.35   | 0.07                 | 0.03 - 0.21   | 0.04                | 0.001 - 0.19  | 0.13                 | 0.12 - 0.13   |
| IP            | 0.18   | -     | 0.08                | 0.001 - 0.47   | 0.19                 | 0.13 - 0.28   | 0.06                | 0.002 - 0.29  | 0.23                 | 0.17 - 0.29   |
| HCB           | 0.0002 | -     | 0.002               | 0.0003 - 0.006 | 0.002                | 0.001 - 0.003 | 2e-05               | 1e-05 - 2e-04 | 3e-05                | 2e-05 - 8e-05 |

**Table S3.** Input parameters varied and default confidence Factors (CFs) used for Sensitivity and Propagation of Uncertainty Analysis

| <b>1. Chemical Properties</b>                        |     |
|------------------------------------------------------|-----|
| Property Temperature (C)                             | 1   |
| Molar Mass (g/mol)                                   | 1   |
| Melting point (C)                                    | 1   |
| Aqueous solubility (g/m <sup>3</sup> )               | 1.5 |
| Vapor pressure (Pa)                                  | 1.5 |
| Kow ( <i>not</i> Log Kow)                            | 3   |
| Kaw ( <i>not</i> Log Kow)                            | 3   |
| Kow ( <i>not</i> Log Kow)                            | 3   |
| Koa ( <i>not</i> Log Kow)                            | 3   |
| Air Reaction half-life (h)                           | 3   |
| Vegetation Reaction half-life (h)                    | 3   |
| Fresh Water Reaction half-life (h)                   | 3   |
| Coastal Water Reaction half-life (h)                 | 3   |
| Soil Reaction half-life (h)                          | 3   |
| Sediment Reaction half-life (h)                      | 3   |
| Enthalpy of vaporization (from water to air) (J/mol) | 1.2 |
| Enthalpy of solution (from octanol to water) (J/mol) | 1.2 |
| <b>2. Emission Parameters in All Regions</b>         |     |
| Emissions to Bulk Upper Air (kg/y)                   | 3   |
| Emissions to Bulk Lower Air (kg/y)                   | 3   |
| Emissions to Bulk Vegetation (kg/y)                  | 3   |
| Emissions to Bulk Fresh Water (kg/y)                 | 3   |
| Emissions to Bulk Coastal Water (kg/y)               | 3   |
| Emissions to Bulk Soil (kg/y)                        | 3   |
| Emissions to Bulk Sediment (kg/y)                    | 3   |
| Background Upper Air Conc (ng/m <sup>3</sup> )       | 3   |
| Background Lower Air Conc (ng/m <sup>3</sup> )       | 3   |
| Background Fresh Water Conc (ng/L)                   | 3   |
| Background Coastal Water Conc (ng/L)                 | 3   |

| <b>3. Environmental Characteristics in All Regions</b> |      |
|--------------------------------------------------------|------|
| Total Surface Area (km <sup>2</sup> )                  | 1    |
| % Surface covered by fresh water                       | 1.1  |
| % Surface covered by coastal water                     | 1.5  |
| % Soil covered by vegetation                           | 1.1  |
| Leaf Area Index (m <sup>2</sup> /m <sup>2</sup> )      | 1.5  |
| vegetation mass per square meter (kg/m <sup>2</sup> )  | 1.5  |
| Average lower air compartment height (km)              | 1.5  |
| Average upper air compartment height (km)              | 1.5  |
| Average fresh water depth (m)                          | 1.5  |
| Average coastal water depth (m)                        | 1.5  |
| Average soil depth (cm)                                | 1.5  |
| Average fresh water sediment depth (cm)                | 3    |
| Volume Fraction Particles in upper air                 | 3    |
| Volume Fraction Particles in lower air                 | 3    |
| Volume Fraction Particles in fresh water               | 3    |
| Volume Fraction Fish in fresh water                    | 3    |
| Volume Fraction Particles in coastal water             | 3    |
| Volume Fraction Fish in coastal water                  | 3    |
| Volume Fraction Air in soil                            | 1.1  |
| Volume Fraction Water in soil                          | 1.1  |
| Volume Fraction Soil solids                            | 1.1  |
| Volume Fraction Sediment pore water                    | 1.1  |
| Volume Fraction Sediment solids                        | 1.1  |
| Volume Fraction Water in vegetation                    | 1.1  |
| Volume Frac (Pseudo)Octanol in vegetation flesh        | 3    |
| Winter mean temperature (oC)                           | 1.1  |
| Summer mean temperature (oC)                           | 1.1  |
| Fraction OC Particles in fresh water                   | 1.5  |
| Fraction OC Particles in coastal water                 | 1.5  |
| Fraction OC Soil solids                                | 1.5  |
| Fraction OC Sediment solids                            | 1.5  |
| Average Vegetation Cycle                               | 1.1  |
| density of air particles (1,2) (2,2)                   | 1.5  |
| density of water (4,1)                                 | 1.05 |
| density of water particles (4,2)                       | 1.5  |
| density of water biota (4,3)                           | 1.05 |
| density of soil solids (6,3)                           | 1.5  |
| density of sediment solids (7,2)                       | 1.5  |
| density of coastal biota (5,3)                         | 1.05 |
| density of vegetation flesh (3,2)                      | 1.5  |
| 1 air side air-fresh water MTC                         | 3    |
| 2 water side air-fresh water MTC                       | 3    |
| 3 rain rate                                            | 3    |
| 4 aerosol depositon                                    | 3    |
| 5 soil air phase diffusion MTC                         | 3    |
| 6 soil water phase diffusion MTC                       | 3    |
| 7 soil air boundary layer MTC                          | 3    |
| 8 sediment-water diffusion MTC                         | 3    |
| 9 sediment deposition                                  | 3    |

|                                                       |     |
|-------------------------------------------------------|-----|
| 10 sediment resuspension                              | 3   |
| 11 soil water runoff                                  | 3   |
| 12 soil solids runoff                                 | 3   |
| 13 sediment burial                                    | 3   |
| 14 diffusion to stratosphere                          | 3   |
| 15 leaching from soil                                 | 3   |
| 16 leaf side air-veg. MTC                             | 3   |
| 17 air side air-veg. MTC                              | 3   |
| 18 veg. water uptake velocity                         | 3   |
| 19 upper-lower air mixing MTC                         | 10  |
| 20 air side air-coastal water MTC                     | 3   |
| 21 water side air-coastal water MTC                   | 3   |
| rain scavenging ratio                                 | 10  |
| Snow scavenging ratio                                 | 10  |
| Fraction of rain intercepted by foliage               | 1.1 |
| <b>4. Inter-regional Flow Rates (Matrix G values)</b> |     |
| Upper air flow rate (m <sup>3</sup> /h)               | 3   |
| Lower air flow rate (m <sup>3</sup> /h)               | 3   |
| Fresh water flow rate (m <sup>3</sup> /h)             | 3   |
| Runoff water flow rate (m <sup>3</sup> /h)            | 3   |
| Coastal water flow rate (m <sup>3</sup> /h)           | 3   |
